1

2 **Enhanced learning and sensory salience in a cerebellar mouse autism model**

3

4 Marlies Oostland<sup>1,†,\*</sup>, Mikhail Kislin<sup>1</sup>, Yuhang Chen<sup>1</sup>, Tiffany Chen<sup>2</sup>,

5 Sarah Jo Venditto<sup>1</sup>, Ben Deverett<sup>3</sup>, Samuel S.-H. Wang<sup>1,\*</sup>

6

7 <sup>1</sup>Neuroscience Institute, Princeton University, Princeton, NJ, USA.

8 <sup>2</sup>Department of Neurological Surgery, University of California, San Francisco, CA, USA.

9 <sup>3</sup>Department of Anesthesiology, Stanford University Medical Center, Stanford, CA, USA.

10

11 \*Corresponding authors: [sswang@princeton.edu](mailto:sswang@princeton.edu) (SW), [m.oostland@ucl.ac.uk](mailto:m.oostland@ucl.ac.uk) (MO)

12

13 <sup>†</sup>Present address: Wolfson Institute for Biomedical Research, University College London,

14 London, UK.

15 **Among the impairments manifested by autism spectrum disorder (ASD) are sometimes**  
16 **islands of enhanced function<sup>1,2</sup>. Although neuronal mechanisms for enhanced functions in**  
17 **ASD are unknown, the cerebellum is a major site of developmental alteration, and early-life**  
18 **perturbation to it leads to ASD with higher likelihood than any other brain region<sup>3,4</sup>. Here**  
19 **we report that a cerebellum-specific transgenic mouse model of ASD shows faster learning**  
20 **on a sensory evidence-accumulation task<sup>5</sup>. In addition, transgenic mice showed enhanced**  
21 **sensitivity to touch and auditory cues, and prolonged electrophysiological responses in**  
22 **Purkinje-cell complex spikes and associative neocortical regions. These findings were**  
23 **replicated by pairing cues with optogenetic stimulation of Purkinje cells. Computational**  
24 **latent-state analysis of behavior<sup>6-8</sup> revealed that both groups of mice with cerebellar**  
25 **perturbations exhibited enhanced focus on current rather than past information, consistent**  
26 **with a role for the cerebellum in retaining information in memory<sup>9</sup>. We conclude that**  
27 **cerebellar perturbation can activate neocortex via complex spike activity and reduce reliance**  
28 **on prior experience, consistent with a weak-central-coherence account in which ASD traits**  
29 **arise from enhanced detail-oriented processing<sup>1</sup>. This recasts ASD not so much as a disorder**  
30 **but as a variation that, in particular niches, can be adaptive.**

31  
32 Autism spectrum disorder (ASD) is associated not only with deficits, but also islands of  
33 enhanced function, including perceptual domains and technical or even artistic capacities<sup>1,2</sup>.  
34 According to the weak central coherence account of ASD, these enhanced capacities can be  
35 explained by a detail-focused cognitive style in which individual perceptual features are  
36 emphasized. ASD is also associated with abnormality of the cerebellum, whose roles extend  
37 beyond movement to include cognition, sensory processing, learning, and memory<sup>10-12</sup>. Functional

38 effects can arise developmentally, since early-life cerebellar injury leads to ASD and other  
39 disabilities with higher likelihood than adult injury<sup>3,4,13,14</sup>. These nonmotor influences of the  
40 cerebellum may be conveyed via long-range connections that project throughout thalamus and  
41 neocortex<sup>15</sup>.

42

### 43 **Cerebellum-dependent losses of function**

44 In mice, cerebellar disruption can lead to deficits in attention, behavioral flexibility, and  
45 social interaction<sup>16</sup>. However, how enhanced function emerges from abnormal cerebellar circuits  
46 is unknown. To answer this question, we examined *L7-Tsc1* mutants, a mouse model of ASD in  
47 which *tuberous sclerosis complex 1* is deleted specifically in cerebellar Purkinje cells<sup>17,18</sup>. *L7-Tsc1*  
48 mutant mice show perseveration and deficits in gait and social interactions (Fig. 1a), as well as  
49 deficits in relatively simple learned tasks such as delayed eyeblink conditioning and motor learning  
50 on the accelerating rotarod<sup>17,18</sup>. *L7-Tsc1* mutant mice have reduced numbers of Purkinje cells (Fig.  
51 1a), and surviving Purkinje cells show lower firing rates both *ex vivo*<sup>17</sup> and *in vivo*, with reduced  
52 simple-spike and complex-spike rates in awake animals (Fig. 1b).

53 We examined more complex forms of learning and information processing by training mice  
54 to integrate sensory evidence in working memory using an established evidence-accumulation  
55 decision-making paradigm<sup>5,20</sup>. Post-learning performance of this task depends on cerebellar crus  
56 I<sup>5,9</sup>, a region that is also necessary for other nonmotor functions<sup>16</sup>, and where *L7-Tsc1* mutants  
57 have reductions in Purkinje cells (Extended Data Fig. 1). During the task, mice receive sensory air  
58 puffs on the left and right whiskers, and receive a reward for correctly licking in the direction of  
59 more puffs (Fig. 1c). Mice progress through increasingly difficult levels of task shaping during

60 which evidence becomes more complex and an increasing temporal delay separates sensory  
 61 information from the decision (Extended Data Table 1).

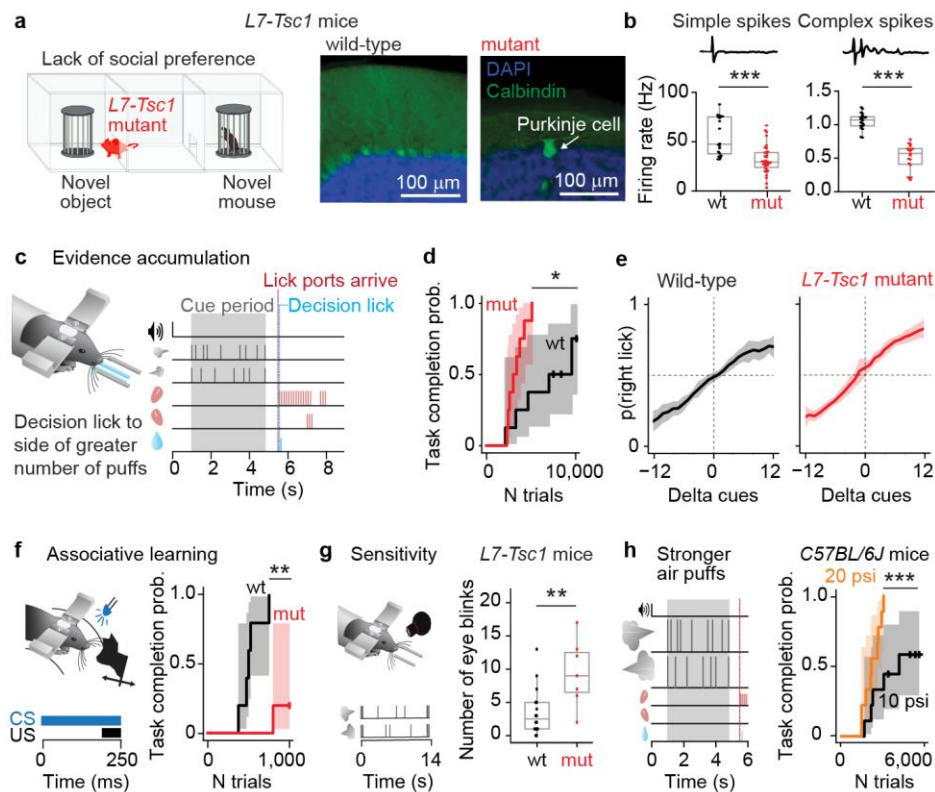

62

63 **Fig. 1 | Cerebellar-impaired mice show enhanced learning of an evidence-accumulation**  
 64 **decision-making task. a**, *L7-Tsc1* mutant mice have impaired social capacity and flexible  
 65 behavior<sup>17-19</sup> (left) and reduced number of Purkinje cells in the cerebellar cortex (right). **b**,  
 66 Reduced spontaneous *in vivo* firing rates of simple spikes and complex spikes in *L7-Tsc1* mutant  
 67 mice (simple spikes:  $n = 34$  cells, mean = 32 Hz, complex spikes:  $n = 19$  cells from 4 mice,  
 68 mean = 0.51 Hz) compared to wild-type littermates (simple spikes:  $n = 20$  cells, mean = 55 Hz,  
 69  $t(1) = 5.06$ ,  $P = 5.5 \times 10^{-6}$ , complex spikes:  $n = 20$  cells from 5 mice, mean = 1.05 Hz,  $t(1) =$   
 70  $10.55$ ,  $P = 1.1 \times 10^{-12}$ , both two-sided Student's  $t$ -tests). The duration of the example waveforms  
 71 above each plot is 15 ms. **c**, The evidence-accumulation task. Mice receive sensory air puffs on  
 72 the left and right whiskers, and receive a reward for correctly licking in the direction of more  
 73 puffs. **d**, Kaplan-Meier estimator of probability of reaching the final level of task training for *L7-*  
 74 *Tsc1* mutant mice ( $n = 8$ , median 3410 trials) and wild-type littermates ( $n = 8$ , median 9636  
 75 trials,  $\chi^2(1) = 6.49$ ,  $P = 0.011$ , log-rank test). **e**, Psychometric performance curves in mice who  
 76 recently reached the final level show no change in bias ( $t(1) = 1.73$ ,  $P = 0.21$ ), slope ( $t(1) = 0.15$ ,  
 77  $P = 0.70$ ), or lapse rate ( $t(1) = 3.44$ ,  $P = 0.085$ , all two-sided Student's  $t$ -tests). Shading  
 78 represents 1 s.d. **f**, Impaired learning of the delayed tactile startle conditioning task for *L7-Tsc1*  
 79 mutant mice ( $n = 5$ , median 1000 trials) compared to wild-type littermates ( $n = 5$ , median 500

80 trials,  $\chi^2(1) = 9.70$ ,  $P = 0.0018$ , log-rank test). **g**, Increased sensory sensitivity in *L7-Tsc1* mutant  
81 mice ( $n = 16$ ) compared to wild-type littermates ( $n = 7$ ,  $t(1) = 10.30$ ,  $P = 0.0042$ , two-sided  
82 Student's *t*-test unadjusted; for full data set see Extended Data Fig. 2). **h**, Increased sensory  
83 salience through stronger puffs also leads to enhanced learning. Kaplan-Meier estimator of task  
84 completion for *C57BL/6J* animals receiving standard (10 psi,  $n = 9$ , median 4275 trials) or  
85 stronger (20 psi,  $n = 9$ , median 2225 trials) whisker puffs during the evidence accumulation task  
86 ( $\chi^2(1) = 7.11$   $P = 0.00047$ , log-rank test). Shaded areas in Kaplan-Meier curves represent 95%  
87 confidence intervals.

88

## 89 **Enhanced learning and sensory responses**

90 *L7-Tsc1* mutant mice successfully reached the final level of training twice as quickly as  
91 wild-type littermates (Fig. 1d), showing enhanced learning capabilities. The faster learning rate  
92 was not correlated with age or corticosterone level. Faster learning already occurred at the earliest  
93 stages of training (Extended Data Fig. 8). Once animals had reached the expert stage, in the first  
94 few sessions at the final level there was no difference in overall performance between *L7-Tsc1*  
95 mutant mice and their wild-type littermates (Fig. 1e). This performance is comparable to animals  
96 who have been trained extensively at the final level of a similar task<sup>5,9,20</sup>. Despite their accelerated  
97 learning on the air puff task, *L7-Tsc1* mutant mice were still slower to learn a separate delay tactile  
98 startle conditioning behavior (DTSC)<sup>21</sup> (Fig. 1f), a cerebellum-dependent form of classical  
99 conditioning involving simple sensory association<sup>18</sup>.

100 We hypothesized that the superior learning rate in these mice might be related to sensory  
101 processing of air puffs. Because effects on learning rate were already present from the onset, we  
102 measured sensory sensitivity before training on the evidence-accumulation task. Naive *L7-Tsc1*  
103 mutant mice showed enhanced response to individual air puffs (Fig. 1g with full dataset in  
104 Extended Data Fig. 2b), as well as to auditory stimuli (Extended Data Fig. 2c,d), indicative of  
105 altered sensory processing. In wild-type *C57BL/6J* mice, increasing the intensity of air puffs from  
106 10 psi to 20 psi was sufficient to accelerate training to a degree similar to that seen in *L7-Tsc1*

107 mutant mice (Fig. 1h). This suggests that early sensory sensitivity may aid in high-accuracy  
108 performance during learning of a task requiring integration of sensory evidence, such as the  
109 evidence-accumulation task.

110 To measure the neural signals accompanying enhanced learning capacity, we performed *in*  
111 *vivo* electrophysiological recordings in crus I in awake behaving naive mice (Fig. 2a), since  
112 improved learning was already evident at early stages of training. In wild-type mice, sensory cues  
113 triggered complex spikes (Fig. 2b), with a delayed simple-spike response (Fig. 2c). In contrast, in  
114 *L7-Tsc1* mutant mice, complex spikes were activated only after a delay of several hundred  
115 milliseconds (Fig. 2b), with decreased simple-spike response (Fig. 2c) and consequent  
116 disinhibition of negative feedback from deep nuclei (Extended Data Fig. 3a) onto inferior olivary  
117 neurons<sup>22,23</sup>.

118 Deep nuclear neurons send excitatory disynaptic projections throughout neocortex<sup>15</sup>,  
119 including two associative regions implicated in decision-making<sup>24-26</sup> that receive substantial  
120 disynaptic input from crus I<sup>15</sup>: anterior cingulate (Fig. 2d) and anterolateral motor cortex (Extended  
121 Data Fig. 3b). Recordings from these regions showed an enhancement in cue-evoked activity with  
122 a similar time course as complex-spike activity. These effects were not seen in the barrel field of  
123 the primary somatosensory cortex (Extended Data Fig. 3c). These results suggest that cerebellar  
124 neural activity might play a causal role in influencing neocortical activity to drive learning.

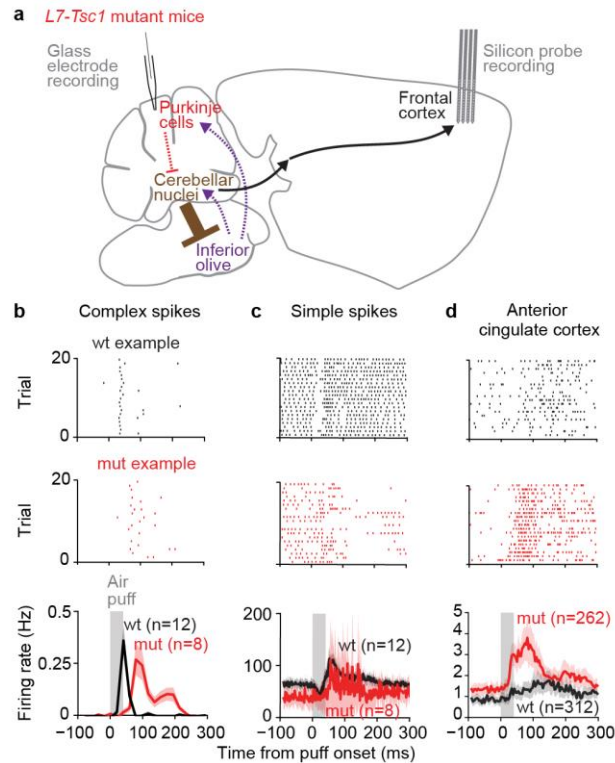

125

126 **Fig. 2 | Prolonged whisker puff responses in awake behaving *L7-Tsc1* mice in cerebellar**  
127 **complex spikes and forebrain.** **a**, Recording sites in cerebellum-neocortical path of influence in  
128 whisker puff responses in *L7-Tsc1* mutant mice. **b-d**, Example raster plots of Purkinje cell  
129 complex spikes (**b**), Purkinje cell simple spikes (**c**) and for anterior cingulate cortex (**d**) during 20  
130 trials from one wild-type animal (top) and one *L7-Tsc1* mutant animal (middle), and average  
131 firing rates in response to an air puff to the whiskers (data from 4 *L7-Tsc1* mutants and 5 wild-  
132 type mice). Shaded areas represent 95% confidence intervals.

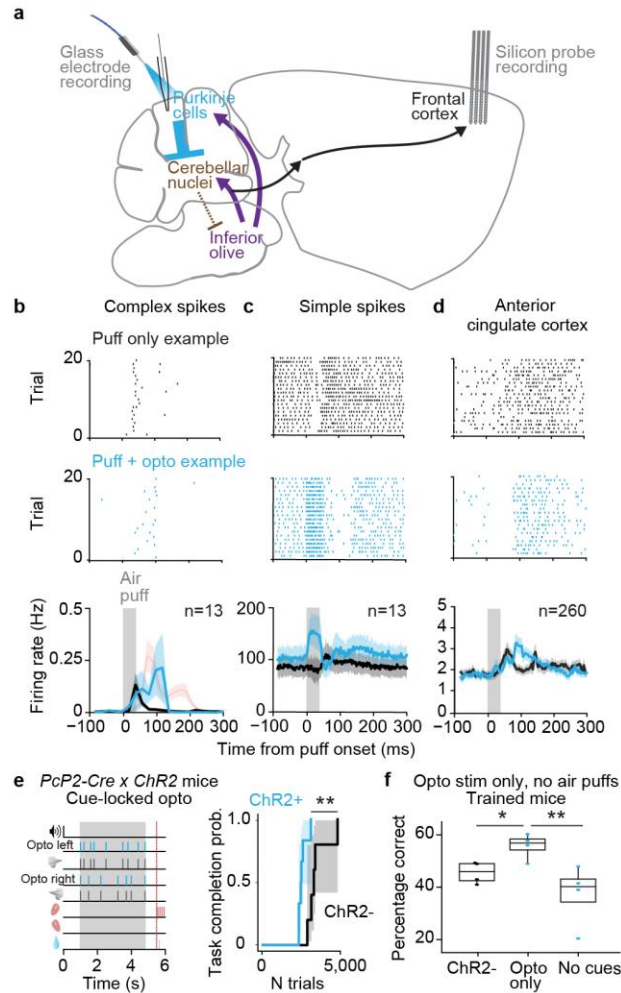

133

134 **Fig. 3 | Altered whisker puff responses and faster learning with cue-locked optogenetic**  
 135 **activation of Purkinje cells.** **a**, Recording sites in cerebellum-neocortical path of influence in  
 136 whisker puff responses paired with optogenetic stimulation of Purkinje cells in crus I. **b-d**,  
 137 Example raster plots of Purkinje cell complex spikes (**b**, data from 4 mice), Purkinje cell simple  
 138 spikes (**c**), and anterior cingulate cortex (**d**, data from 3 mice) during 20 trials with only a  
 139 whisker puff (top) or with a whisker puff paired with optogenetic stimulation (middle), and  
 140 average firing rates (bottom). The red line in the bottom plot of **b** indicates the firing rate for *L7-*  
 141 *Tsc1* mutant mice (Fig. 2b) for comparison. Shaded areas represent 95% confidence intervals. **e**,  
 142 Schematic and Kaplan-Meier estimator of task completion probability for *Pcp2-Cre x Chr2*  
 143 mice with cue-locked bilateral optogenetic activation of crus I in the evidence-accumulation task  
 144 ( $n = 6$ , median 2512 trials) and wild-type littermates ( $n = 5$ , median 3311 trials,  $\chi^2(1) = 8.18$ ,  $P =$   
 145  $0.0042$ , log-rank test). **f**, Performance in the evidence-accumulation task in trained *Pcp2-Cre x*  
 146 *Chr2* mice with only cue-locked optogenetic activation of Purkinje cells in crus I ( $n = 4$ , mean  
 147 percentage correct: 55.8%), and two controls without stimuli: one without *ChR2* expression ( $n =$   
 148  $4$ , 45.6% correct), the other without light ( $n = 4$ , 37.2% correct). Overall effect:  $H(2) = 7.65$ ,  $P =$   
 149  $0.022$  (Kruskal-Wallis test), with significant differences between *ChR2+* and *ChR2-* mice ( $P =$



150 0.046, Conover post-hoc test) and ChR2+ and no cues ( $P = 0.0044$ ). Due to anti-biasing  
151 parameters, chance level is different for each animal but always below 50%.  
152

### 153 **Optogenetic replication of fast learning**

154 To understand whether the neocortical activity and enhanced learning found in *L7-Tsc1*  
155 mutant mice is driven by Purkinje cell complex spikes or simple spikes, we directly manipulate  
156 simple spike activity by expressing the optogenetic probe channelrhodopsin-2 in Purkinje cells of  
157 wild-type mice. *In vivo* recordings in awake behaving naive ChR2-expressing mice (Fig. 3a)  
158 indeed showed an increase in simple spike firing during the air puff paired with optogenetic  
159 stimulation (Fig. 3c), which is the opposite effect of that seen in *L7-Tsc1* mutant mice. On the  
160 other hand, complex spike firing was increased and delayed (Fig. 3b), a similar effect to that seen  
161 in *L7-Tsc1* mutant mice, due to a putatively disinhibitory effect of simple-spike firing on nucleo-  
162 olivary paths<sup>27</sup>. Firing enhancement coincided with the end of the optogenetic stimulus (Extended  
163 Data Fig. 4d), consistent with a disinhibitory effect. Furthermore, silicon probe recordings in  
164 neocortex showed enhancements in associative anterior cingulate (Fig. 3d) and anterolateral motor  
165 region (Extended Data Fig. 4b) activity, but not in the barrel field of the primary somatosensory  
166 cortex (Extended Data Fig. 4c), mimicking neocortical activity in *L7-Tsc1* mutant mice.  
167 Behavioral results were consistent with the similarity in complex spike and neocortical activity  
168 patterns compared to *L7-Tsc1* mutant mice: pairing sensory stimuli with ipsilateral light flashes  
169 applied over crus I also led to faster learning than in controls not expressing ChR2 (Fig. 3e). After  
170 training, optogenetic stimuli delivered without sensory cues could also drive decision-making  
171 above chance (Fig. 3f), suggesting that alterations in Purkinje cell activity could target effectors in  
172 common with sensory cues. Thus learning can be augmented by perturbation of Purkinje cell  
173 complex-spike activity during sensory stimulation, either via *Tsc1* knockout or by optogenetic

174 activation, both of which generate similar alterations of complex spike timing and neocortical  
175 activity.

176

### 177 **Mutants stay on-task and in the present**

178 To understand the relation between early sensory sensitivity and high-accuracy  
179 performance throughout training, we performed computational latent-state analysis of the learning  
180 process. This analysis identifies shifts in behavioral response patterns occurring between groups  
181 of trials that reveal variations in internal states over time<sup>6-8</sup>. We fitted trial-by-trial outcomes to a  
182 generalized linear model - hidden Markov model (GLM-HMM), trained on a separate data set of  
183 22 wild-type mice and then fitted to the experimental animals (Fig. 4a).

184 Based on these fits, mouse behavior could be sorted into three major categories that differed  
185 in their dependence on task parameters (Fig. 4b). Mice in the on-task state 1 made the most correct  
186 decisions, relying heavily on the left-right difference in sensory cues (Fig. 4c), and less on the  
187 animals' choice in the previous trial (Fig. 4d). In all mice, learning was accompanied by more time  
188 spent in the on-task state (Fig. 4f,g,i). Early in training, wild-type mice tended to spend time in  
189 state 2, a past-trial-driven state in which mice relied more heavily on past rather than present  
190 information, thus reducing their decision accuracy (Fig. 4c), with responses strongly dependent on  
191 the choices made in the previous two trials (Fig. 4d); and state 3, an inattentive state in which mice  
192 were only weakly sensitive to any features of the task (Fig. 4c,d). On a moment-to-moment basis,  
193 wild-type mice made transitions from state to state on the time scale of dozens or hundreds of trials  
194 (Fig. 4e). Transitions away from state 1 occurred largely at the end of a session, when animals  
195 switch from the on-task state to the disengaged state (see example in Fig. 4f).

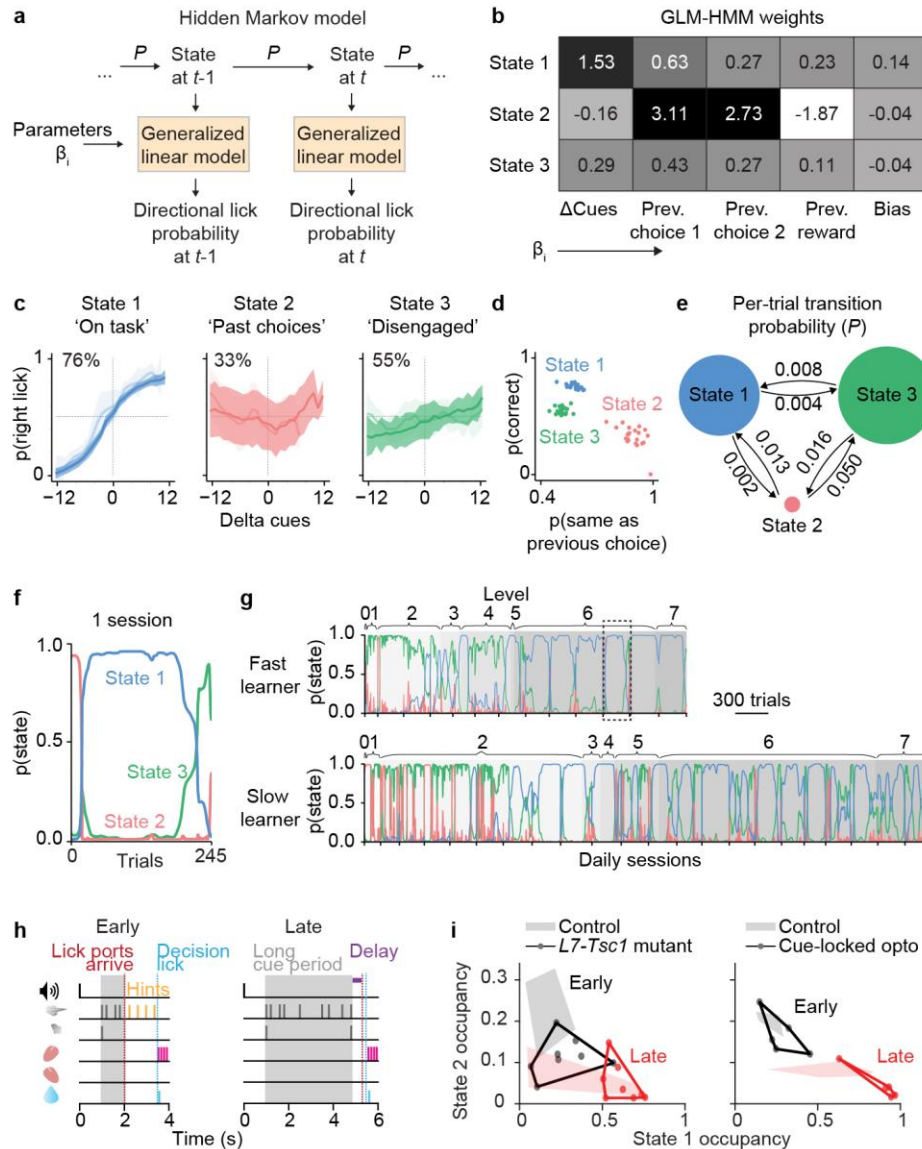

196

197 **Fig. 4 | Latent behavioral-state analysis of task learning shows increased on-task focus in**  
 198 **faster learners with cerebellar manipulations. a**, Schematic illustrating the GLM-HMM.  $P$  is  
 199 state transition probability. **b**, Inferred GLM-HMM weights from the training data set. **c**,  
 200 Psychometric curves averaged across all mice. In the top left is the percentage correct over all  
 201 trials in that state. Shaded areas represent one s.d. Lighter curves indicate early trials and darker  
 202 curves indicate late trials (see panel **h**). **d**, Probability of a correct choice against the probability  
 203 that the choice in the current trial was the same as the choice in the previous trial. Each data point  
 204 represents the average across all trials for one mouse. **e**, Per-trial transition rate between the three  
 205 states averaged over all mice. The size of the circles indicate state occupancy across all trials of  
 206 the mice in the training data set. **f**, Posterior state probabilities for one example session. **g**, Posterior  
 207 state probabilities for all trials in all sessions from a fast learner (top) and a slow learner (bottom).  
 208 The dashed area in the top panel indicates the session in **f**. **h**, Two different stages of the evidence-

209 accumulation task. **i**, State 1 and state 2 occupancy during early and late stages for *L7-Tsc1* animals  
210 (left) and mice with cue-locked optogenetic activation of Purkinje cells in crus I (right). Each data  
211 point represents one mouse. Shaded areas indicate the area covered by control animals.  
212

213         At the early stages of learning, animals mostly occupied state 2 or 3 until they made a  
214 transition to consistent state 1 occupancy (Fig. 4g,i). This shift in state occupancy occurred in all  
215 animals, and took more trials for slower learners (examples in Fig. 4g). Teaching the evidence-  
216 accumulation task to animals can be divided into two stages of task shaping: early, during which  
217 the animals still receive hint puffs to guide their choice, and late, during which animals need to  
218 accumulate the evidence in progressively more difficult trials (Fig. 4h). *L7-Tsc1* mutant mice  
219 already had higher state 1 occupancy than wild-type mice at the earliest stages of training, and this  
220 increased occupancy continued throughout the late stages (Fig. 4i, left and Extended Data Fig. 8a).  
221 The shape of the psychometric curves of *L7-Tsc1* mutant mice in each state was similar to their  
222 wild-type littermates (Extended Data Fig. 5).

223         Cerebellum-driven acceleration of learning might arise from enhancement of immediate  
224 cue experience, or alternately require longitudinal shaping across sessions. To distinguish these  
225 possibilities, we optogenetically reinforced each cue, but starting only after mice had passed out  
226 of the early stage of training. We found that mice showed an immediate tendency toward increased  
227 occupancy of on-task state 1 and reduced occupancy of prior-trial state 2 (Extended Data Fig. 8b).  
228 Specifically, 4 out of 5 optogenetically-reinforced mice spent more than 90% of the trials in state  
229 1 and less than 5% of the trials in state 2 (Fig. 4i, right). This tendency continued through the rest  
230 of late training. In separate experiments, untreated animals which received stronger (20 psi) air  
231 puffs in late training also showed elevated current-trial-state occupancy throughout training  
232 (Extended Data Fig. 6c and Extended Data Fig. 8c).

233           When Purkinje cells in crus I are optogenetically stimulated in trained mice during the  
234   entire cue period and delay period including the first lick (Extended Data Fig. 7a), performance is  
235   impaired by forgetting immediately-past experience<sup>9</sup>. Even though such continuous stimulation  
236   increased overall simple-spike activity, it did not enhance simple-spike responses to individual  
237   sensory cues, and there was no change in complex spike firing in response to whisker puffs  
238   (Extended Data Fig. 7c,d) and no detectable effect on the learning rate (Extended Data Fig. 7b) or  
239   whisker puff responses in forebrain areas (Extended Data Fig. 7e,g,h). At levels with optogenetic  
240   stimulation, there was no change in state 1 occupancy, although there was a reduction in state 2  
241   occupancy (Extended Data Fig. 6f and Extended Data 8d). In summary, under all conditions that  
242   accelerated learning, reduction in state 2 occupancy was visible at the earliest stages of  
243   perturbation (Extended Data Fig. 8).

244

### 245   **Cerebellum, global coherence, and autism**

246           Our experiments support the idea that cerebellar complex-spike output can accelerate  
247   learning through altered forebrain activity and increased on-task focus. Cerebellar activity is  
248   transmitted to neocortical structures via major paths through thalamus and other midbrain  
249   structures<sup>15,28</sup> that may convey these influences. Among the extensive neocortical targets of  
250   cerebellar projections is the parietal cortex, where, interestingly, silencing of activity was recently  
251   shown to improve performance in evidence accumulation by reducing reliance on past evidence<sup>29</sup>.  
252   Cerebellum and neocortex project to one another bidirectionally in a loopwise manner via  
253   thalamus, pons, and midbrain structures<sup>30,31</sup>, including distributed influence of lobules over diverse  
254   associative and premotor regions<sup>15</sup>. Such connectivity provides a substrate for delayed activation

255 and spatially distributed responses. Indeed, in *L7-Tsc1* mutant mice, inhibition of the medial  
256 prefrontal cortex has previously been found to improve social deficits and repetitive behaviors<sup>32</sup>.

257         In the central coherence account of autism spectrum disorder, the capacity to extract global  
258 form and meaning is displaced by superiority on local or detail-focused processing<sup>1</sup>. Our work in  
259 a mouse ASD model demonstrates one aspect of such processing, sensory hypersensitivity<sup>2</sup>, and  
260 an association with accelerated capacity to learn a sensory-integration task. Our results also show  
261 one predicted feature of such increased sensitivity, hyperreactivity of local neocortical circuits<sup>33</sup>.  
262 The atypicalities of sensation and perception reported in ASD can be interpreted in terms of a  
263 broadening of Bayesian priors about the sensory world. “Hypo-priors” can account for a tendency  
264 among autistic persons “to perceive the world more accurately rather than [be] modulated by prior  
265 experience”<sup>34</sup>. In this way, autistic people see the world more accurately on an immediate basis, a  
266 trait that can both impair everyday life and lead to high performance in specific skill domains. The  
267 potential for variation in a brain trait to both disrupt features of everyday life and enhance specific  
268 skill domains recasts autism spectrum disorder not so much as a disorder but as a variation that, in  
269 particular niches, can be adaptive<sup>1</sup> (Extended Data Fig. 9).

270 **Acknowledgements**

271 We thank members of the Wang lab and the BRAIN CoGS consortium for discussion and  
272 advice, G. Joseph Broussard, Caroline Jung, Junuk Lee, Laura Lynch, Dafina Pacuku, and John  
273 Wuethrich for help with experiments, Jonathan Pillow for advice on latent-state analysis, Zahra  
274 Dhanerawala, Austin Hoag, and Sanjeev Janarthanan from the BRAIN CoGS Histology Core for  
275 brain clearing, imaging and probe localization, and Carlos Brody, Sabine Kastner, Manuel  
276 Schottdorf and Thomas Zhihao Luo for comments on the manuscript. The work was supported  
277 by National Institutes of Health grants R01 NS045193, R01 MH115750, and U19 NS104648 to  
278 SW, and European Union's Horizon 2020 research and innovation programme under the Marie  
279 Skłodowska-Curie grant agreement No 844318 to MO.

280

281 **Author contributions**

282 S.W. conceptualized the research. M.O., S.W., M.K. and B.D. designed the experiments. M.O.,  
283 M.K. and T.C. performed the experiments. M.O. and Y.C. did data analysis and visualization.  
284 S.J.V. provided the code for the GLM-HMM analysis. M.O. and S.W. did funding acquisition,  
285 project administration, and supervision. S.W. and M.O. wrote the original draft, and M.O., Y.C.,  
286 and B.D. reviewed and edited the paper.

287

288 **Competing interests**

289 Authors declare no competing interests.

290 **Methods**

291

292 **Mice.** Experimental procedures were approved by the Princeton University Institutional Animal  
293 Care and Use Committee (protocol 1943-19) and performed in accordance with the animal  
294 welfare guidelines of the National Institutes of Health and in line with the European Directive  
295 2010/62/EU on the protection of animals used for experimental purposes.

296 Data came from 133 mice (males and females, 2 – 5 months of age at the start of  
297 experiments) of genotypes *C57BL/6J* (The Jackson Laboratory, Bar Harbor, ME, 40 animals),  
298 *Pcp2-Cre* for Purkinje-cell specificity and *Ai27D* for channelrhodopsin-2 (33 animals *Pcp2-Cre*  
299 x *Ai27D*, acquired from The Jackson Laboratory, stock #010536 (RRID:IMSR\_JAX:010536)  
300 and #012567 (RRID:IMSR\_JAX:012567), respectively) and *L7<sup>Cre</sup>;Tsc1<sup>flox/flox</sup>* mice (60 animals).  
301 To create these Purkinje cell specific *L7<sup>Cre</sup>;Tsc1<sup>flox/flox</sup>* mice, *Tsc1<sup>flox/flox</sup>* (*Tsc1<sup>tm1Djk</sup>/J*, The Jackson  
302 Laboratory stock #005680) mutant mice were crossed into L7-Cre mice (B6.129-Tg(*Pcp2-*  
303 *cre*)2Mpin/J, The Jackson Laboratory, stock #004146). Experimenters were blinded to the  
304 genotypes of the mice for the duration of the behavioral experiments.

305 All mice were group-housed in reverse light cycle to promote maximal performance  
306 during behavioral testing, which took time during the day. For long-term behavioral experiments,  
307 mice were housed in darkness in an enrichment box containing bedding, houses, wheels (Igloo  
308 and Fast-Trac; K3250/K3251; Bio-Serv; Flemington, NJ, USA), climbing chains, and play tubes  
309 during all experimental days. At other times, mice were housed in cages in the animal facility, in  
310 groups of 2–4 mice per cage. During experiments in which water intake was restricted, mice  
311 received 1.0–1.5 mL of filtered water per day plus half of a mini yogurt drop (F7577; Bio-Serv;



312 Flemington, NJ, USA), and body weight (aimed at 85% of baseline body weight) and condition  
313 was monitored daily. Mice always had *ad libitum* access to food pellets.

314

315 **Surgical procedures.** For all surgeries, mice were anesthetized with isoflurane (5% for  
316 induction, 1.0 – 2.5% for maintenance), and were given buprenorphine (0.1 mg/kg body weight)  
317 and rimadyl (5 mg/kg body weight) after surgery and were given at least 5 days of recovery in  
318 their home cages before the start of experiments, except for acute *in vivo* electrophysiology  
319 experiments when the animals were allowed to recover for at least two hours between the  
320 craniotomy and the acute recordings.

321 For optogenetic experiments, a custom-machined titanium headplate<sup>35</sup> was cemented to  
322 the skull using dental cement (C and B Metabond, Parkell Inc). Two ~500  $\mu$ m diameter  
323 craniotomies were drilled over the cerebellum, one over each hemisphere, directly posterior to  
324 the lamboid suture and ~3.6mm lateral to the midline in either direction. Ferrule implants were  
325 constructed with 400- $\mu$ m-diameter optical fiber (Thorlabs FT400EMT) glued to 1.25-mm OD  
326 stainless steel ferrules (Precision Fiber Products MM-FER2007-304-4500) using epoxy  
327 (Precision Fiber Products PFP 353ND). Ferrules were positioned over each craniotomy with the  
328 fiber tip at the surface of the dura mater, and Vetbond (3 M) was applied surrounding the  
329 exposed fiber. Dental cement was then applied to secure the ferrule to the skull. Implants were  
330 cleaned before each behavior session using a fiber optic cleaning kit (Thorlabs CKF).

331 For *in vivo* electrophysiology, a headplate was implanted as described above, and a 2 mm  
332 craniotomy was drilled over the area of interest and the dura removed. For recordings from  
333 neocortex, the following stereotaxic coordinates were used: anterior cingulate cortex: ML 0 – 0.5  
334 mm, AP 0.5 – 1.5 mm, DV 0.7 – 1.0 mm, anterolateral motor cortex: ML 1.5 mm, AP 2.5 mm,

335 DV 0.7 – 1.0 mm, and barrel field of the primary somatosensory cortex: ML 2.5 – 3.5 mm, AP -  
336 0.8 – -1.8 mm, DV 0.6 – 1.5 mm. Two stainless steel screws for ground and reference wires  
337 (000–120 1/16 SL bind machine screws, Antrin miniature specialties, Inc) were inserted in the  
338 skull above the forebrain as far away from the craniotomy as possible. For cerebellar recordings,  
339 a small hole was drilled for a reference electrode in the interparietal bone at the midline.  
340 Craniotomies (0.5 mm by 1 – 1.5 mm) were made next to the intersection of interparietal and  
341 occipital bones and over the left and right lobule V and simplex for extracellular single-unit  
342 recordings. Craniotomies were covered with Kwik-Cast silicone adhesive (World Precision  
343 Instruments) until the time of the recording.

344

345 **Behavior experiments.** Mice were trained to perform an evidence-accumulation decision-  
346 making task as described previously<sup>5,9</sup>. The behavioral apparatuses were controlled by custom-  
347 written Python software as published previously<sup>5</sup>  
348 ([https://github.com/wanglabprinceton/accumulating\\_puffs](https://github.com/wanglabprinceton/accumulating_puffs)). Animals were trained for 1.5 – 9  
349 weeks, 7 days/week. Briefly, head-fixed mice were seated in a tube for daily one-hour behavioral  
350 sessions consisting of 200 – 300 trials. In each trial, independent streams of randomly timed 40-  
351 ms air puffs of 10 psi (unless otherwise indicated) with a minimum 200 ms interpuff interval  
352 were delivered to the left and right sides over the course of a 1.0 – 3.8-second cue period. After a  
353 delay period of 200 – 800 ms, lick ports were advanced into the reach of the animal, and animals  
354 received a 4  $\mu$ l water reward when they licked to the side with the greater number of puffs. The  
355 animal's decision was interpreted as the side licked first, regardless of subsequent licks. Anti-  
356 biasing procedures<sup>5</sup> result in chance levels being < 50%. To increase motivation, restriction of

357 water intake started at least 5 days before the start of training and continued throughout the  
358 whole training period.

359 Animals went through different levels of training (levels 0 – 6) to reach the final version  
360 of the task (level 7). Mice automatically proceeded to the next level once they reached pre-  
361 defined performance criteria (see Extended Data Table 1 for details of each level as well as the  
362 performance criteria). The time it took an animal to learn the task was defined as the total  
363 number of trials to reach level 7. For experiments with air puffs at 20 psi, stronger air puffs were  
364 delivered at every trial starting at level 3.

365 Light for optogenetic stimulation during the evidence-accumulation task was delivered as  
366 described previously<sup>9</sup>. Cue-locked optogenetic activation occurred unilaterally, at the same side  
367 and time at an air puff, for a duration of 40 ms (generated by Master-8, A.M.P.I.). Continuous  
368 optogenetic activation occurred bilaterally with 5-ms pulses at 50 Hz throughout the entire cue  
369 period, delay period, and ended upon first lick contact. When optogenetic activation was used to  
370 manipulate the learning rate, the optogenetic activation only started from level 3, and at every  
371 trial from then on. When optogenetic activation was used to manipulate performance in trained  
372 mice (Fig. 3f), light was on in 20% of trials. In this case, analysis compares light-off and light-on  
373 trials only from behavioral sessions in which light was delivered.

374 For the delay tactile startle conditioning (DTSC) task<sup>21</sup>, mice learned to elicit a startle  
375 (backward) movement in response to an initially neutral conditioned stimulus (CS; 250 ms; 5mm  
376 395 – 400nm UV Ultraviolet LED, EDGELEC) that was paired with a startle-eliciting  
377 unconditioned stimulus (US, 20 ms tactile stimulus on the nose by taping foam that was attached  
378 to the stepper motor shaft (High Torque Nema 17 Bipolar Stepper Motor 92oz.in/65Ncm 2.1A  
379 Extruder Motor, Stepper Online); CS-US inter-stimulus interval, 200 ms).

380 For sensory sensitivity tests, naive animals were headfixed in a similar setup to the  
381 evidence-accumulation setup and received either whisker puffs or auditory cues. Animals were  
382 not trained nor expected to do anything in response to the sensory cues, and did not receive any  
383 rewards throughout the session. Animals received cues in sequences of in total 24 cues starting  
384 and ending with three cues with 200 ms inter-cue interval, and in between those, cues at random  
385 intervals (ranging from 0.8 to 3 s). Animals first received a sequence with cue durations of 8 ms,  
386 followed by sequences with longer cue durations (15, 30, and 45 ms for whisker puffs, and 15,  
387 30, 45, 90, 180, 320, and 640 ms for auditory cues). Animals either received bilateral air puffs to  
388 the whiskers at 20 – 25 psi, or auditory cues at 12 kHz. During sensitivity tests with whisker  
389 puffs, white noise was on in the background throughout the experiment. To determine eye blink  
390 responses, movies of the right side of their face and body were acquired using two USB cameras  
391 (Playstation Eye), modified by removal of infrared filters and encasings. Images were acquired at  
392 30 Hz with  $320 \times 240$  pixel resolution. Illumination was provided by an infrared LED array  
393 (Yr.seasons 48-LED Illuminator Light CCTV 850 nm IR Infrared Night Vision). Air puffs were  
394 produced by activation of solenoids (NResearch, standard two-way normally closed isolation  
395 valve, 161T011) with input from an air source (ControlAir Type 850 Miniature Air Pressure  
396 Regulator). Air was delivered via two tubes custom-machined with uniform openings, and  
397 positioned parallel to one another, parallel to the anteroposterior axis of the animal, 10 mm apart  
398 mediolaterally and ~1 mm anterior to the nose of the animal. Auditory cues were delivered to the  
399 apparatus by a speaker (Sony Tweeter XS-H20S) mounted below the apparatus. Analysis of eye  
400 blinks was performed using FaceMap (<https://github.com/MouseLand/facemap>)<sup>36</sup> with manual  
401 curation and further analysis in Python.

402

403 ***In vivo* electrophysiology.** For acute recordings from awake behaving mice, animals were head-  
404 fixed over a freely rotating cylindrical treadmill and the craniotomy site was opened by removing  
405 the Kwik-Cast plug and then filled with saline. Recordings were performed using either silicon  
406 probes for neocortex or glass electrodes for cerebellum, as described below. Air puffs to the  
407 whiskers were delivered by a pressure injector system (Toohey Spritzer, Toohey, Fairfield, NJ,  
408 USA) which received signals from a signal generator (Master-8; AMPI) with an intensity of 20  
409 psi and a frequency of 1 Hz, except for experiments with continuous optogenetic activation  
410 throughout the entire cue and delay period, when air puffs were delivered with a frequency of 0.2  
411 Hz. Mice received unilateral air puffs ipsilaterally to the recording site for Purkinje cells, anterior  
412 cingulate cortex, and anterolateral motor cortex, and contralaterally to the recording site for  
413 cerebellar nuclei and the barrel field of the somatosensory cortex. For recordings with  
414 optogenetic stimulation, light onset started at the same time as the air puff for the duration of the  
415 air puff (40ms) unless indicated otherwise. In a subset of experiments (Extended Data Fig. 4d)  
416 light started at the same time as the air puff but remained on for longer (250 ms).

417 For neocortical recordings, a 64-channel silicon probe (Neuronexus, A4x16-5mm-50-  
418 200-177 or A2x32-Poly5-10mm-20s-200-100) covered in Vybrant™ CM-DiI Cell-Labeling  
419 Solution (V22888; Invitrogen) was slowly placed above the craniotomy and lowered into the  
420 brain using a motorized micromanipulator (MP-225; Sutter Instrument Co.). The silicon probes  
421 were connected to two amplifier boards (RHD2132, Intan Technologies) using a dual headstage  
422 adapter (RHD2000, Intan Technologies). Recordings were made using an Open Ephys  
423 acquisition board at a sampling rate of 30 kHz. High-pass filtering of the raw data at 300 Hz,  
424 common median referencing, and automatic spike sorting was achieved using Kilosort 2  
425 (<https://github.com/cortex-lab/Kilosort>)<sup>37</sup>. Spikes were further manually curated using the Phy

426 GUI (<https://github.com/kwikteam/phy>). Neocortical recording locations were verified post  
427 mortem by identifying the CM-DiI fluorescence in cleared brains (see histology section below).

428         Single-unit recordings of Purkinje neurons and cerebellar nuclei neurons were performed  
429 using borosilicate glass electrodes (1B100F-4, World Precision Instruments) with 1 – 2- $\mu$ m tips,  
430 short for Purkinje cells or very long gradual tapers for cerebellar nuclei cells, and 3 to 12 M $\Omega$   
431 impedance, fabricated on a pipette puller (P-2000, Sutter Instruments Co.) and filled with sterile  
432 saline. The electrode was lowered into the cerebellum using an electrode holder that was  
433 positioned at a 40 or 90° angle to the craniotomy and controlled by a motorized  
434 micromanipulator (MP-225; Sutter Instrument Co.). The obtained electrical signals were  
435 amplified with a CV-7B headstage and Multiclamp 700B amplifier, digitized at 10 kHz with a  
436 Digidata 1440A and acquired in pClamp (Axon Instruments, Molecular Devices) in parallel with  
437 transistor-transistor logic (TTL) pulses from a signal generator (Master-8; AMPI) and with signal  
438 from pressure injector system (Toohey Spritzer, Toohey, Fairfield, NJ, USA). Purkinje neurons  
439 were identified by the presence of complex spikes followed by a characteristic pause in simple  
440 spikes. The cerebellar nuclei contain a high density of neurons that are deeper than and well  
441 separated from cerebellar cortical layers, and show clear single unit spike activity. Spike  
442 detection was performed using custom code written in MATLAB 2019a.

443

444 **Histology.** Animals were anesthetized with an overdose of ketamine (400 mg/kg)/xylazine (50  
445 mg/kg) (i.p.) and transcardially perfused using a peristaltic pump with phosphate buffered saline  
446 (PBS) with 10 mg/ml heparin (Sigma H3149-100KU), followed by chilled 10% formalin (Fisher  
447 Scientific). Brains were extracted from the skull after perfusion, postfixed overnight at 4°C,  
448 washed and stored in PBS at room temperature. To visualize the probe locations using the CM-

449 DiI track, brains were cleared and imaged by the BRAIN CoGS histology core facility. All  
450 brains underwent the same abbreviated iDISCO+ clearing protocol as previously described<sup>15</sup>. In  
451 short, after an overnight fix in 4% PFA, brains were rinsed in PBS at room temperature for four  
452 30 minute sessions. Immediately brains were dehydrated 1 hour at each ascending concentration  
453 of methanol (20, 40, 60, 80, 100, 100%) and placed overnight in methanol at room temperature.  
454 The next day, they were being placed in 66% dichloromethane (DCM)/33% methanol for 3 hours  
455 at room temperature. Brains were cleared with 100% DCM for two 15 minute steps then placed  
456 in 100% benzyl ether (DBE). Brains were kept in fresh DBE prior to imaging and after for long-  
457 term storage. Tissue was imaged using a light-sheet microscope (Ultramicroscope II, LaVision  
458 Biotec., Bielefeld, Germany).

459 For quantification of Purkinje cells, Purkinje cells were stained with calbindin. Animals  
460 were transcardially perfused as described above, and after postfixation were stored in PBS at 4°C  
461 until sectioning. Whole brain sagittal sections were cut at 90 µm and collected in 0.1 M PBS.  
462 Sections were processed for immunohistology by washing with PBS and incubating for 1 hour at  
463 room temperature in a blocking buffer (10% normal goat serum, 0.5% Triton in PBS) prior to a  
464 2-day incubation at 4°C in PBS buffer containing 2% NGS, 0.4% Triton and the rabbit anti-  
465 calbindin-D-28K primary antibody (C7354; Sigma-Aldrich St. Louis, MO, USA; 1:1000).  
466 Sections were subsequently washed in PBS, incubated for 2 hours at room temperature in the  
467 PBS buffer with goat anti-rabbit Alexa Fluor 488-conjugated secondary antibody (A-11008;  
468 Thermo Fisher Scientific, MA, USA, Invitrogen; 1:400), mounted on glass slides and covered  
469 with Vectashield. Images were acquired on the epifluorescent microscope Hamamatsu  
470 Nanozoomer. Using NDP.view2 Plus software, individual lobules were identified and Purkinje  
471 cells were assigned to lobules for counting.

472 **Corticosterone measurements.** Animals were food deprived for 12 – 24 hours before blood  
473 collection. Immediately after receiving air puffs to whiskers at 20 – 25 psi in a headfixed setup  
474 for 10 – 20 minutes, ~50  $\mu$ l of blood was collected from the tail vein using a capillary tube, and  
475 then immediately disposed of in a heparin-coated 1.5 ml eppendorf tube. Samples were stored on  
476 wet ice for maximum 4 hours, after they were centrifuged for 10 minutes at 4 °C at 3000 rpm. Of  
477 each sample 2 – 10  $\mu$ l of plasma was collected, placed in new non-coated 1.5 ml eppendorf tubes  
478 and stored at -80 °C. For each animal, two duplicate samples of 1  $\mu$ l each were used to determine  
479 plasma corticosterone levels using the Corticosterone ELISA Kit (K014; Arbor Assays, Ann  
480 Arbor, MI, USA) according to the manufacturer’s protocol. Plate reading was done using an  
481 Infinite 200Pro (Tecan Life Sciences, Morrisville, NC, USA) with i-control software. Results  
482 from both duplicates were averaged to get one final corticosterone measurement per animal.

483

484 **Generalized linear model - hidden Markov model.** The generalized linear model - hidden  
485 Markov model (GLM-HMM) combines a set of Bernoulli GLMs with a hidden Markov model<sup>6-</sup>  
486 <sup>8</sup>. For each trial, the animal is modeled to have a latent state that governs its strategy to process  
487 information in order to make the binary choice of which side to lick. Each state corresponds to a  
488 specific GLM with a unique weight vector of input variables. Between trials, the transition  
489 matrix of HMM defines the probability to change from one state to another. The output of GLM-  
490 HMM in each trial is calculated as the probability of a Bernoulli response (i.e. the probability of  
491 a rightward lick) based on both the latent state of current trial and the input variables. Delta cues  
492 ( $\Delta$  cues) is the number of air puffs on the right side minus the number of air puffs on the left  
493 side. Guide air puffs (‘hints’) are included. Previous choice 1 is the animal's choice on the  
494 previous trial. Previous choice 2 is the animal's choice of the trial prior to the previous trial.



495 Previous reward is the side of the reward on the previous trial. Bias is an offset constant in each  
496 state that represents the tendency to lick rightward independent of other input variables. The  
497 trials used to calculate the psychometric curve of a latent state are selected to have a posterior  
498 probability for that state larger than 0.8. The state occupancy of a certain state is calculated as the  
499 fraction of trials whose posterior state probabilities are greatest for that state. The model is  
500 trained with the data of 22 wild-type mice on the air puff evidence accumulation task and fitted  
501 using expectation-maximization algorithm with code adapted from [https://github.com/Brody-](https://github.com/Brody-Lab/venditto_glm-hmm)  
502 [Lab/venditto\\_glm-hmm](https://github.com/Brody-Lab/venditto_glm-hmm).

503

504 **Statistical analysis and presentation.** Statistical tests used are indicated throughout the text. All  
505 further analysis was done with custom-written code in Python 3 using Spyder  
506 (<https://www.spyder-ide.org/>), and R (<https://www.r-project.org/>) using RStudio  
507 (<https://www.rstudio.com/>). For every figure, \* =  $P \leq 0.05$ , \*\* =  $P \leq 0.01$ , \*\*\* =  $P \leq 0.001$ . Box  
508 and whiskers show median/interquartile range, and 1.5x the interquartile range. The left panel of  
509 Fig. 1a was created with BioRender.

510

511 **Code and data availability.** Code used for data acquisition is available at  
512 [https://github.com/wanglabprinceton/accumulating\\_puffs](https://github.com/wanglabprinceton/accumulating_puffs). All data that support the findings of  
513 this study are available from the corresponding authors on reasonable request.

514 **References**

- 515 1. Happé, F. & Frith, U. The weak coherence account: detail-focused cognitive style in autism  
516 spectrum disorders. *J. Autism Dev. Disord.* **36**, 5–25 (2006).
- 517 2. Mottron, L., Dawson, M., Soulières, I., Hubert, B. & Burack, J. Enhanced perceptual  
518 functioning in autism: an update, and eight principles of autistic perception. *J. Autism Dev.*  
519 *Disord.* **36**, 27–43 (2006).
- 520 3. Limperopoulos, C. *et al.* Does cerebellar injury in premature infants contribute to the high  
521 prevalence of long-term cognitive, learning, and behavioral disability in survivors?  
522 *Pediatrics* **120**, 584–593 (2007).
- 523 4. Wang, S. S.-H., Kloth, A. D. & Badura, A. The cerebellum, sensitive periods, and autism.  
524 *Neuron* **83**, 518–532 (2014).
- 525 5. Deverett, B., Koay, S. A., Oostland, M. & Wang, S. S.-H. Cerebellar involvement in an  
526 evidence-accumulation decision-making task. *eLife* **7**, e36781 (2018).
- 527 6. Ashwood, Z. C. *et al.* *Mice alternate between discrete strategies during perceptual decision-*  
528 *making.* 2020.10.19.346353 <https://www.biorxiv.org/content/10.1101/2020.10.19.346353v3>  
529 (2021) doi:10.1101/2020.10.19.346353.
- 530 7. Calhoun, A. J., Pillow, J. W. & Murthy, M. Unsupervised identification of the internal states  
531 that shape natural behavior. *Nat. Neurosci.* **22**, 2040–2049 (2019).
- 532 8. Bolkan, S. S. *et al.* *Strong and opponent contributions of dorsomedial striatal pathways to*  
533 *behavior depends on cognitive demands and task strategy.* 2021.07.23.453573  
534 <https://www.biorxiv.org/content/10.1101/2021.07.23.453573v1> (2021)  
535 doi:10.1101/2021.07.23.453573.
- 536 9. Deverett, B., Kislin, M., Tank, D. W. & Wang, S. S.-H. Cerebellar disruption impairs

- 537 working memory during evidence accumulation. *Nat. Commun.* **10**, 3128 (2019).
- 538 10. Heijden, M. E. van der, Gill, J. S. & Sillitoe, R. V. Abnormal cerebellar development in  
539 autism spectrum disorders. *Dev. Neurosci.* **43**, 181–190 (2021).
- 540 11. Carta, I., Chen, C. H., Schott, A. L., Dorizan, S. & Khodakhah, K. Cerebellar modulation of  
541 the reward circuitry and social behavior. *Science* **363**, (2019).
- 542 12. Hatten, M. E. Adding cognitive connections to the cerebellum. *Science* **370**, 1411–1412  
543 (2020).
- 544 13. Küper, M. & Timmann, D. Cerebellar mutism. *Brain Lang.* **127**, 327–333 (2013).
- 545 14. Garfinkle, J. *et al.* Location and size of preterm cerebellar hemorrhage and childhood  
546 development. *Ann. Neurol.* **88**, 1095–1108 (2020).
- 547 15. Pisano, T. J. *et al.* Homologous organization of cerebellar pathways to sensory, motor, and  
548 associative forebrain. *Cell Rep.* **36**, (2021).
- 549 16. Badura, A. *et al.* Normal cognitive and social development require posterior cerebellar  
550 activity. *eLife* **7**, e36401 (2018).
- 551 17. Tsai, P. T. *et al.* Autistic-like behaviour and cerebellar dysfunction in Purkinje cell Tsc1  
552 mutant mice. *Nature* **488**, 647–651 (2012).
- 553 18. Kloth, A. D. *et al.* Cerebellar associative sensory learning defects in five mouse autism  
554 models. *eLife* **4**, e06085 (2015).
- 555 19. Klibaite, U. *et al.* *Deep behavioral phenotyping of mouse autism models using open-field*  
556 *behavior*. 2021.02.16.431500  
557 <https://www.biorxiv.org/content/10.1101/2021.02.16.431500v1> (2021)  
558 doi:10.1101/2021.02.16.431500.
- 559 20. Pinto, L. *et al.* An accumulation-of-evidence task using visual pulses for mice navigating in

- 560 virtual reality. *Front. Behav. Neurosci.* **12**, 36 (2018).
- 561 21. Yamada, T. *et al.* Sensory experience remodels genome architecture in neural circuit to drive  
562 motor learning. *Nature* **569**, 708–713 (2019).
- 563 22. Kim, O. A., Ohmae, S. & Medina, J. F. A cerebello-olivary signal for negative prediction  
564 error is sufficient to cause extinction of associative motor learning. *Nat. Neurosci.* **23**, 1550–  
565 1554 (2020).
- 566 23. Llinas, R. The olivo-cerebellar system: a key to understanding the functional significance of  
567 intrinsic oscillatory brain properties. *Front. Neural Circuits* **7**, 96 (2014).
- 568 24. Kennerley, S. W., Walton, M. E., Behrens, T. E. J., Buckley, M. J. & Rushworth, M. F. S.  
569 Optimal decision making and the anterior cingulate cortex. *Nat. Neurosci.* **9**, 940–947  
570 (2006).
- 571 25. Chabrol, F. P., Blot, A. & Mrsic-Flogel, T. D. Cerebellar contribution to preparatory activity  
572 in motor neocortex. *Neuron* **103**, 506-519.e4 (2019).
- 573 26. Gao, Z. *et al.* A cortico-cerebellar loop for motor planning. *Nature* **563**, 113–116 (2018).
- 574 27. Bengtsson, F. & Hesslow, G. Cerebellar control of the inferior olive. *The Cerebellum* **5**, 7–14  
575 (2006).
- 576 28. Fujita, H., Kodama, T. & du Lac, S. Modular output circuits of the fastigial nucleus for  
577 diverse motor and nonmotor functions of the cerebellar vermis. *eLife* **9**, e58613 (2020).
- 578 29. Akrami, A., Kopec, C. D., Diamond, M. E. & Brody, C. D. Posterior parietal cortex  
579 represents sensory history and mediates its effects on behaviour. *Nature* **554**, 368–372  
580 (2018).
- 581 30. Strick, P. L., Dum, R. P. & Fiez, J. A. Cerebellum and nonmotor function. *Annu. Rev.*  
582 *Neurosci.* **32**, 413–434 (2009).

- 583 31. Wagner, M. J. & Luo, L. Neocortex-cerebellum circuits for cognitive processing. *Trends*  
584 *Neurosci.* **43**, 42–54 (2020).
- 585 32. Kelly, E. *et al.* Regulation of autism-relevant behaviors by cerebellar–prefrontal cortical  
586 circuits. *Nat. Neurosci.* **23**, 1102–1110 (2020).
- 587 33. Markram, K. & Markram, H. The Intense World Theory – A Unifying Theory of the  
588 Neurobiology of Autism. *Front. Hum. Neurosci.* **4**, (2010).
- 589 34. Pellicano, E. & Burr, D. When the world becomes ‘too real’: a Bayesian explanation of  
590 autistic perception. *Trends Cogn. Sci.* **16**, 504–510 (2012).
- 591 35. Dombek, D. A., Khabbaz, A. N., Collman, F., Adelman, T. L. & Tank, D. W. Imaging large  
592 scale neural activity with cellular resolution in awake mobile mice. *Neuron* **56**, 43–57  
593 (2007).
- 594 36. Stringer, C. *et al.* Spontaneous behaviors drive multidimensional, brain-wide activity.  
595 *Science* **364**, 255 (2019).
- 596 37. Pachitariu, M., Steinmetz, N., Kadir, S., Carandini, M. & Harris, K. D. *Kilosort: realtime*  
597 *spike-sorting for extracellular electrophysiology with hundreds of channels*. 061481  
598 <https://www.biorxiv.org/content/10.1101/061481v1> (2016) doi:10.1101/061481.

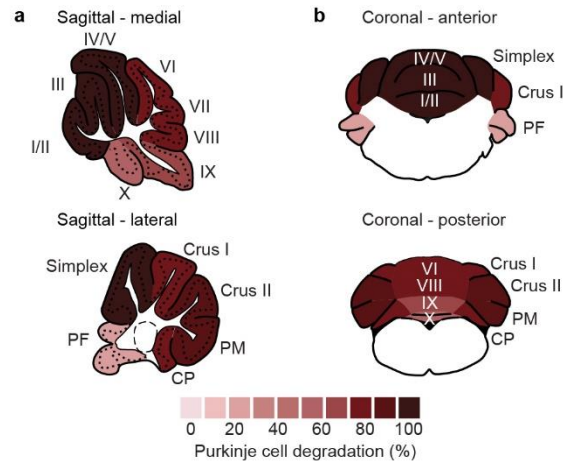

599

600 **Extended Data Fig. 1 | Purkinje cell degeneration in *L7-Tsc1* mutant mice. a-b,** Schematic of  
601 a sagittal (**a**) and coronal (**b**) view of the cerebellum with quantification of Purkinje cell loss  
602 averaged over 4 *L7-Tsc1* mutant mice at 5 – 6 months old for each cerebellar lobule, normalized  
603 to 3 wild-type littermates. C.M., copula pyramidis; P.F., flocculus & paraflocculus; P.M.,  
604 paramedian lobule.

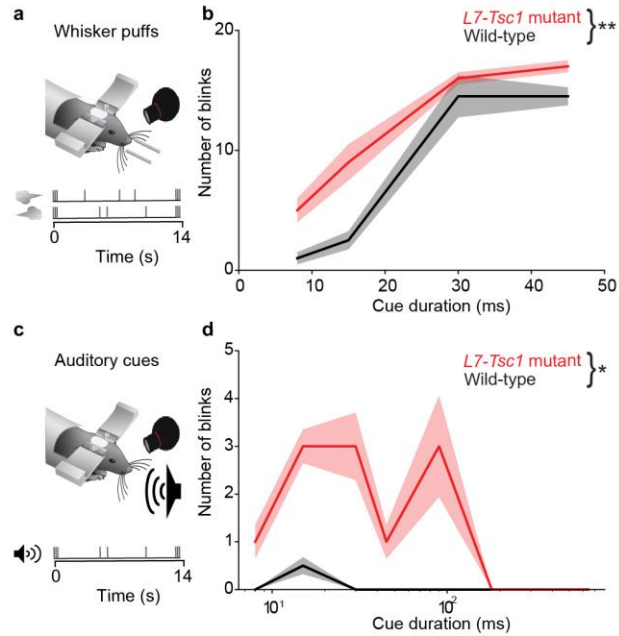

605

606 **Extended Data Fig. 2 | Increased sensory sensitivity in *L7-Tsc1* mice.** **a**, Schematic of sensory  
607 sensitivity test with bilateral and unilateral whisker puffs. **b**, Median number of eye blinks in  
608 response to whisker puffs of different durations for *L7-Tsc1* mutant mice ( $n = 16$ ) and wild-type  
609 littermates ( $n = 7$ ). A two-way ANOVA indicates an effect of genotype ( $F = 7.44$ ,  $P = 0.008$ ), as  
610 well as whisker puff duration ( $F = 32.795$ ,  $P = 3.9 \times 10^{-14}$ ), but no interaction effect ( $F = 0.985$ ,  $P$   
611  $= 0.4$ ). **c**, Schematic of sensory sensitivity tests with auditory cues. **d**, Same as **b**, but for auditory  
612 cues. A two-way ANOVA indicates an effect of genotype ( $F = 5.06$ ,  $P = 0.026$ ), but not of audio  
613 cue duration ( $F = 1.697$ ,  $P = 0.11$ ) or an interaction effect ( $F = 0.347$ ,  $P = 0.93$ ). Shaded areas  
614 indicate the estimated s.e.m. using median absolute deviation.

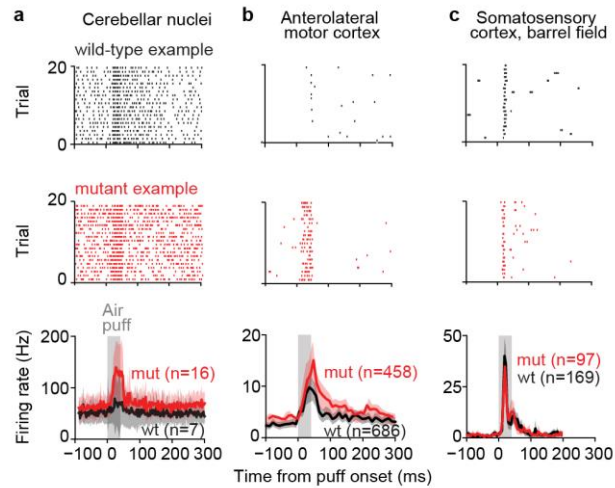

615

616 **Extended Data Fig. 3 | Increased responses to whisker puffs in *L7-Tsc1* mice in cerebellar**  
617 **nuclei and anterolateral motor cortex, but not somatosensory cortex. a-c,** Example raster  
618 plots of cerebellar nuclei cells (a), anterolateral motor cortex (b), and the barrel field of the  
619 primary somatosensory cortex (c) during 20 trials from *L7-Tsc1* mutants (middle) or their wild-  
620 type littermates (top), and average firing rates (bottom) in response to an air puff to the whiskers  
621 (data from the same 4 *L7-Tsc1* mutants and 5 wild-type mice as in Fig. 2). Shaded areas  
622 represent 95% confidence intervals.



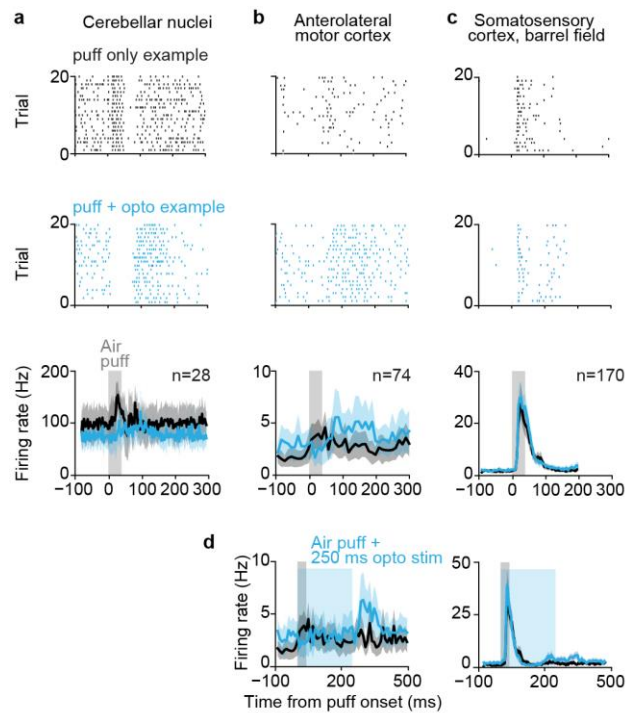

623

624 **Extended Data Fig. 4 | Altered responses to whisker puff and cue-locked optogenetic**  
625 **stimulation of Purkinje cells in crus I in cerebellar nuclei and anterolateral motor cortex,**  
626 **but not somatosensory cortex. a-c,** Example raster plots of cerebellar nuclei cells (a),  
627 anterolateral motor cortex (b), and the barrel field of the primary somatosensory cortex (c)  
628 during 20 trials with only a whisker puff (top) or with a whisker puff paired with optogenetic  
629 stimulation (middle), and average firing rates (bottom) in response to an air puff to the whiskers  
630 with or without paired optogenetic stimulation of Purkinje cells. d, Same as the bottom plots in b  
631 and c, but now with a longer duration (250 ms instead of 40 ms) of the optogenetic stimulation.  
632 Shaded areas represent 95% confidence intervals.

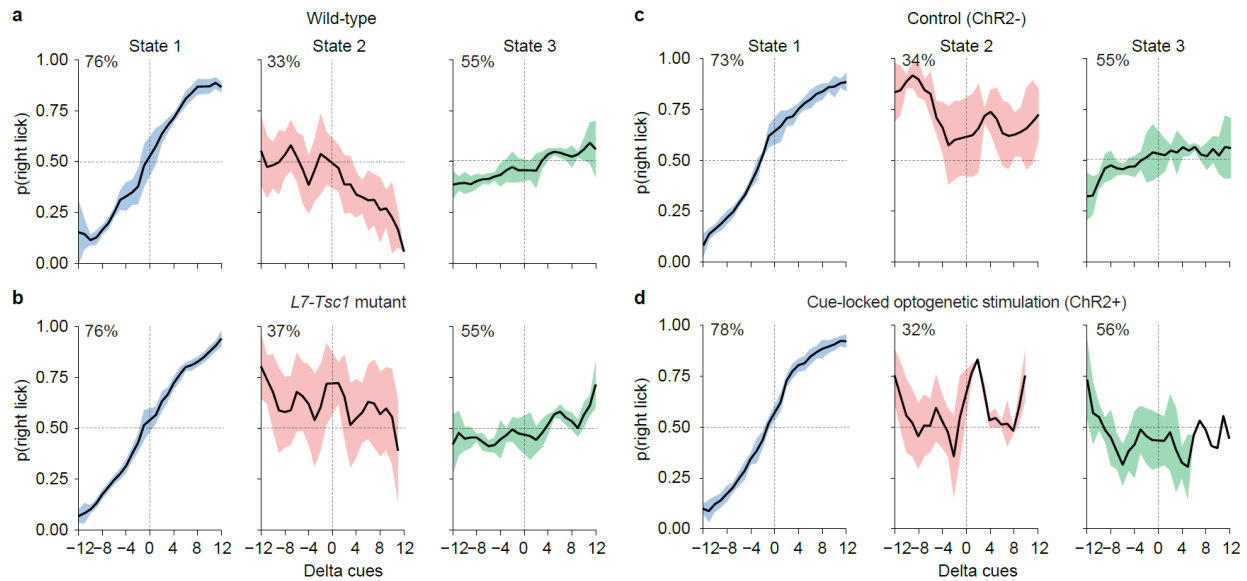

633

634 **Extended Data Fig. 5 | Psychometric curves in the three states remain the same for *L7-Tsc1***  
635 **mice and for mice receiving cue-locked optogenetic stimulation. a-d,** Psychometric curves for  
636 the three states, averaged across all wild-type mice (a), *L7-Tsc1* mutant mice (b), ChR- mice (c)  
637 and ChR+ mice receiving cue-locked optogenetic stimulation of Purkinje cells in crus I (d). In  
638 the top left of each plot is the percentage correct over all trials in that state. Missing data points  
639 or data points without error bars indicate none or one animal at that data point due to low state  
640 occupancy. Shaded areas represent 1 s.d.

641

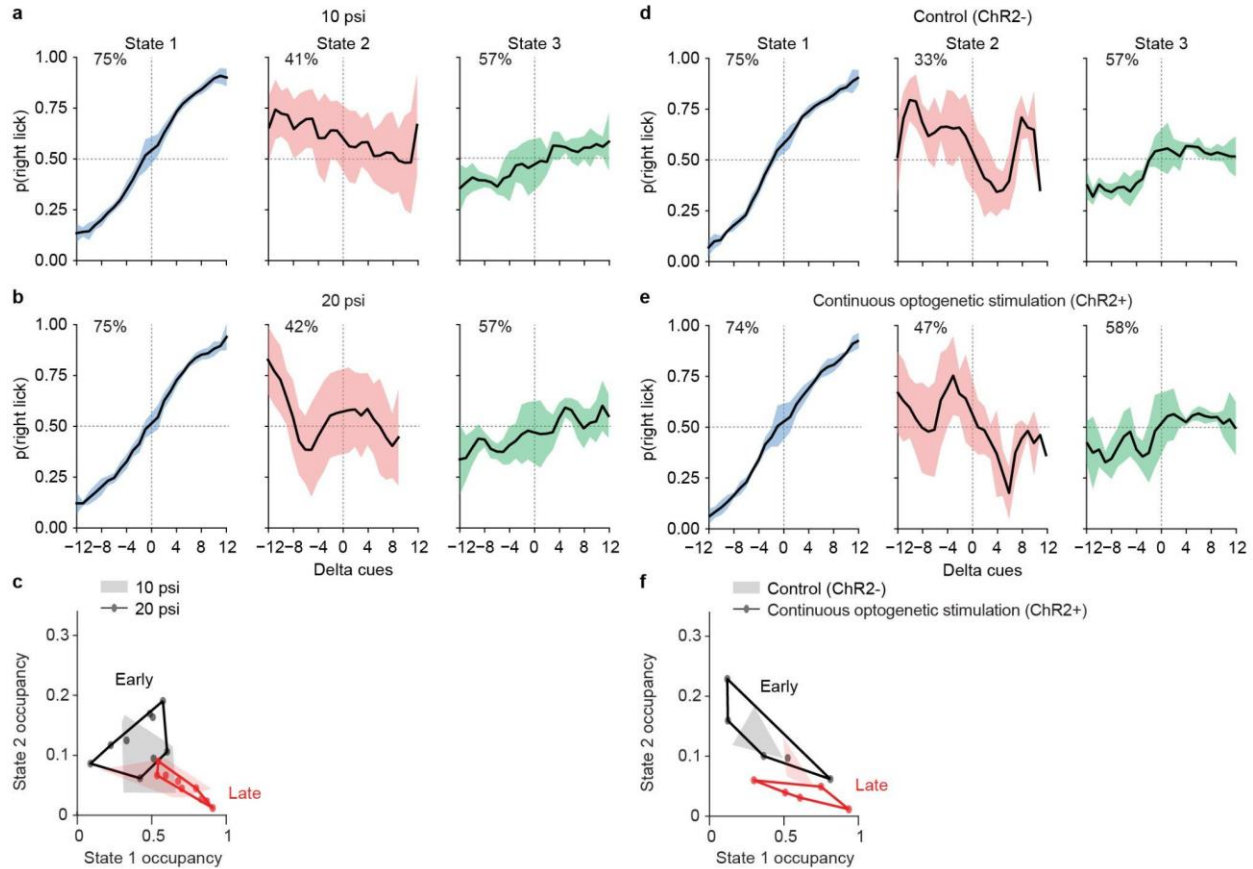

642

643 **Extended Data Fig. 6 | Performance and state occupancy for animals receiving stronger**  
 644 **whisker puffs or optogenetic stimulation of Purkinje cells in crus I throughout the entire**  
 645 **cue period and delay period. a-d**, Psychometric curves for the three states, averaged across all  
 646 mice receiving air puffs to the whiskers of regular intensity (10 psi, **a**) or higher intensity (20 psi,  
 647 **b**) or the normal task version for mice not expressing opsin (ChR2-) (**c**) or for mice expressing  
 648 opsin (ChR2+) and receiving continuous optogenetic stimulation to Purkinje cells in crus I  
 649 during the cue period, delay period, and first lick (**d**). In the top left of each plot is the percentage  
 650 correct over all trials in that state. Shaded areas represent one standard deviation. **e-f**, State  
 651 occupancy for mice receiving stronger whisker puffs (**e**), or optogenetic stimulation (**f**). Note that  
 652 the manipulations did only occur in the late levels of the task. Shaded areas indicate the area  
 653 covered by control animals.

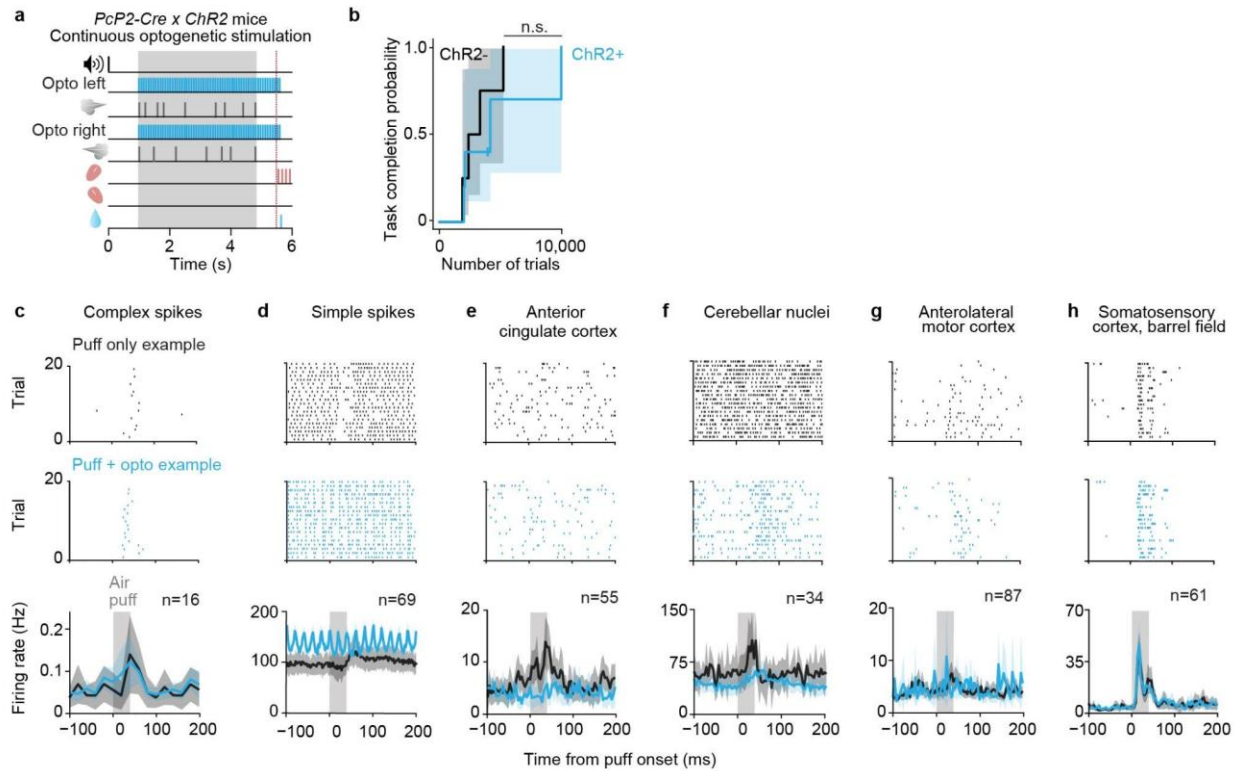

654

655 **Extended Data Fig. 7 | No effect of continuous optogenetic activation of Purkinje cells in**  
 656 **crus I on learning of the evidence-accumulation task. a**, Schematic of the evidence-  
 657 accumulation task with continuous bilateral optogenetic activation of crus I. **b**, Kaplan-Meier  
 658 estimator of task completion probability for *PcP2-Cre* × *ChR2* mice with continuous bilateral  
 659 optogenetic activation of crus I throughout the evidence-accumulation task ( $n = 5$ , median 4210  
 660 trials) compared to wild-type littermates ( $n = 4$ , median 2534 trials,  $\chi^2(1) = 0.31$ ,  $P = 0.33$ , log-  
 661 rank test). **c-h**, Example raster plots of Purkinje cell complex spikes (**c**), Purkinje cell simple  
 662 spikes (**d**) anterior cingulate cortex (**e**), cerebellar nuclei cells (**f**), anterolateral motor cortex (**g**),  
 663 and the barrel field of the primary somatosensory cortex (**h**) during 20 trials with only a whisker  
 664 puff (top) or with a whisker puff paired with discounting optogenetic stimulation (middle), and  
 665 average firing rates in response to an air puff to the whiskers with or without paired optogenetic  
 666 stimulation of Purkinje cells. Shaded areas represent 95% confidence intervals.

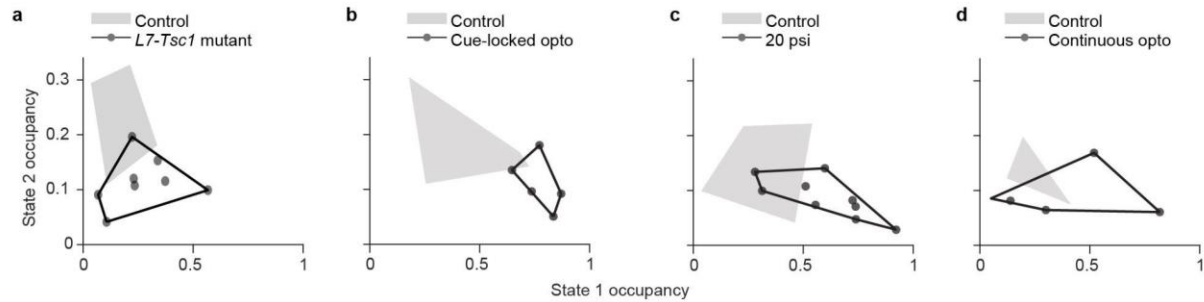

667

668 **Extended Data Fig. 8 | Altered state occupancy occurs already at the earliest levels of**  
669 **manipulation. a,** State occupancy at levels 0, 1, and 2 for *L7-Tsc1* mutant mice. **b,** State  
670 occupancy at levels 3 and 4 for animals receiving cue-locked optogenetic stimulation of crus I. **c,**  
671 State occupancy at levels 3 and 4 for animals receiving stronger air puffs (20 psi) to the  
672 whiskers. **d,** State occupancy at levels 3 and 4 for animals receiving bilateral optogenetic  
673 stimulation of crus I during the entire cue period, delay period, and first lick. Shaded areas  
674 indicate the area covered by control animals.

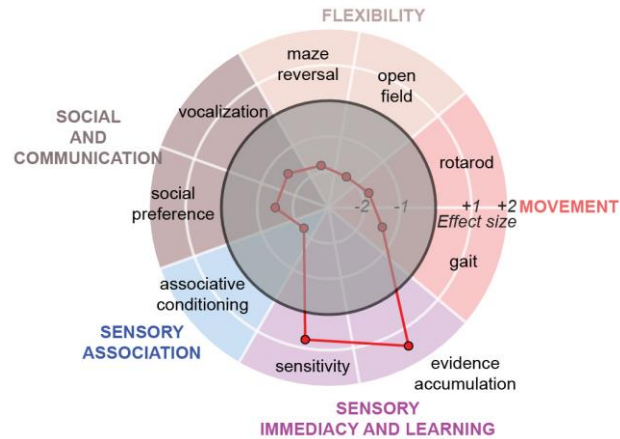

675

676 **Extended Data Fig. 9 | *L7-Tsc1* mutant mice have an island of enhanced sensory sensitivity**  
677 **and learning combined with impaired association learning, social behaviors, flexibility, and**  
678 **movement.** Each dot represents an estimated effect size (Cohen's *d*) for the behavior of *L7-Tsc1*  
679 mutant mice compared to their wild-type littermates. The thick circle indicates typical behavior  
680 (effect size 0). Based on data presented in this paper and from <sup>17-19</sup>.

**Extended Data Table 1 | Mice progress through eight different levels during learning of the evidence-accumulation decision-making task.**

| <b>Level</b>                                   | <b>0</b>               | <b>1</b>                                                 | <b>2</b>                                                 | <b>3</b>                                                 | <b>4</b>                                                 | <b>5</b>                                                | <b>6</b>                                                 | <b>7</b>    |
|------------------------------------------------|------------------------|----------------------------------------------------------|----------------------------------------------------------|----------------------------------------------------------|----------------------------------------------------------|---------------------------------------------------------|----------------------------------------------------------|-------------|
| <b>Audio cue, 1s before cue period onset</b>   | Yes                    | Yes                                                      | Yes                                                      | Yes                                                      | Yes                                                      | Yes                                                     | Yes                                                      | Yes         |
| <b>Bilateral puffs at start</b>                | Yes                    | Yes                                                      | Yes                                                      | Yes                                                      | Yes                                                      | Yes                                                     | Yes                                                      | Yes         |
| <b>Cue period duration (s)</b>                 | 1                      | 1                                                        | 1                                                        | 2.0, 2.8, or 3.8                                         | 3.8, or 1.5                                              | 3.8, or 1.5                                             | 3.8, or 1.5                                              | 3.8, or 1.5 |
| <b>Distractor puffs</b>                        | No                     | No                                                       | No                                                       | No                                                       | No                                                       | No                                                      | Yes, 1:9                                                 | Yes, 1:4    |
| <b>Bilateral puffs at end</b>                  | No                     | No                                                       | Yes                                                      | Yes                                                      | Yes                                                      | Yes                                                     | Yes                                                      | Yes         |
| <b>Delay (ms)</b>                              | 200                    | 200                                                      | 200                                                      | 200                                                      | 500                                                      | 800                                                     | 800                                                      | 800         |
| <b>Guide puffs (2.5 Hz) until animal licks</b> | No                     | Yes                                                      | Yes                                                      | No                                                       | No                                                       | No                                                      | No                                                       | No          |
| <b>Need to lick on correct side for reward</b> | No                     | Yes                                                      | Yes                                                      | Yes                                                      | Yes                                                      | Yes                                                     | Yes                                                      | Yes         |
| <b>Does first lick need to be correct</b>      | No                     | No                                                       | Yes                                                      | Yes                                                      | Yes                                                      | Yes                                                     | Yes                                                      | Yes         |
| <b>Error trials punished</b>                   | No                     | No                                                       | Yes                                                      | Yes                                                      | Yes                                                      | Yes                                                     | Yes                                                      | Yes         |
| <b>Requirements to proceed to next level</b>   | 15 consecutive rewards | at least 100 trials & 55% correct in window of 40 trials | at least 200 trials & 80% correct in window of 50 trials | at least 100 trials & 75% correct in window of 40 trials | at least 100 trials & 80% correct in window of 40 trials | at least 25 trials & 80% correct in window of 24 trials | at least 250 trials & 75% correct in window of 40 trials | N/A         |
